# Supplementary material for: The frequency gradient of human resting-state brain oscillations follows cortical hierarchies
Source: eLife journal article supplement (doi:10.7554/elife.53715), 2020-08-21
Supplement: supp [file elife-53715-supp-v1.zip]

Archive with 9 entries (9 files):
- elife_poa_e53715_Transparent_Reporting_File.pdf
- elife_poa_e53715_Figure_1_figure_supplement_1.pdf
- elife_poa_e53715_Figure_1_figure_supplement_2.pdf
- elife_poa_e53715_Figure_3_figure_supplement_1.pdf
- elife_poa_e53715_Figure_3_figure_supplement_2.pdf
- elife_poa_e53715_Figure_4_figure_supplement_1.pdf
- elife_poa_e53715_Figure_4_figure_supplement_2.pdf
- elife_poa_e53715_Figure_6_figure_supplement_1.pdf
- elife_poa_e53715_Figure_6_figure_supplement_2.pdf
