# Supplementary material for: The frequency gradient of human resting-state brain oscillations follows cortical hierarchies
Source: eLife journal article supplement (doi:10.7554/elife.53715), 2020-08-21

**Figure 1-figure supplement 2**

**A**

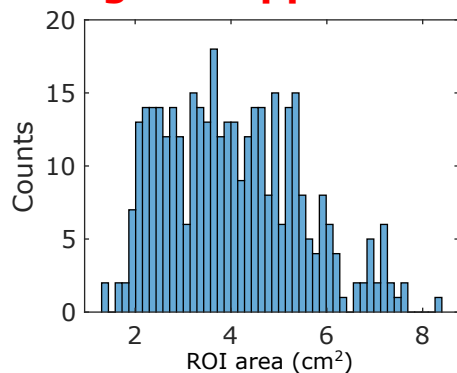

**C**

LMEM:  $PF \sim \text{ROI area} + \text{ROI coordinates}$

|         | ROI area | X | Y            | Z           | X:Y | X:Z | Y:Z          |
|---------|----------|---|--------------|-------------|-----|-----|--------------|
| t-value | 1.5      | 5 | <b>-15.2</b> | <b>-9.9</b> | 2.9 | 1.5 | <b>-31.2</b> |

**B**

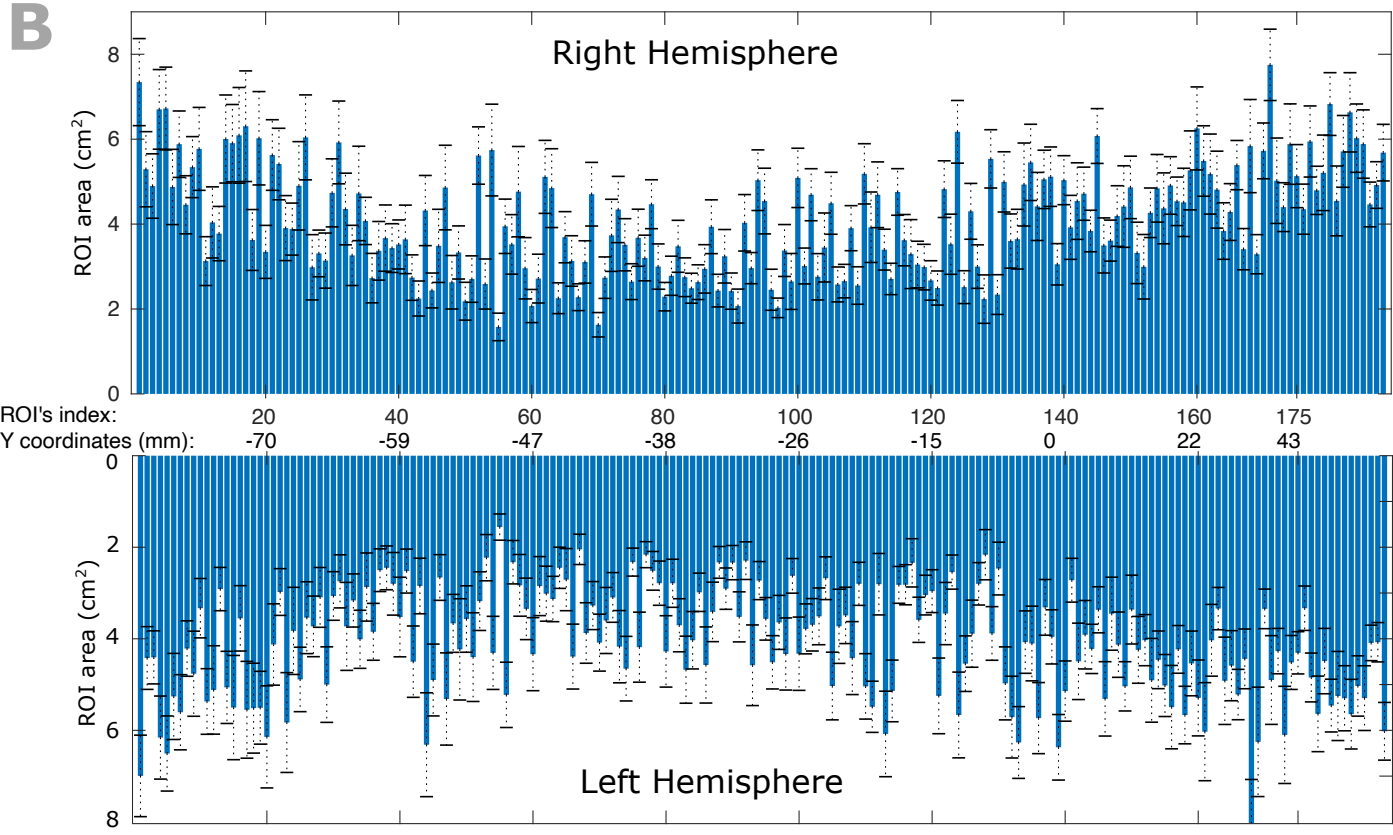

Supplement: supp [file elife-53715-supp-v1.zip › elife_poa_e53715_Figure_1_figure_supplement_2.pdf]
