# Supplementary material for: The frequency gradient of human resting-state brain oscillations follows cortical hierarchies
Source: eLife journal article supplement (doi:10.7554/elife.53715), 2020-08-21
Supplement: supp [file elife-53715-supp-v1.zip › elife_poa_e53715_Figure_4_figure_supplement_1.pdf]

# Figure 4-figure supplement 1

LMEM: PFres  $\sim$  Resting State Networks

|         | SOM | CON | DAN        | VAN         | FPN | AUD | DMN        |
|---------|-----|-----|------------|-------------|-----|-----|------------|
| t-value | 1.6 | 0.8 | <b>2.5</b> | <b>-2.4</b> | 1.8 | 0.6 | <b>3.2</b> |

ANOVA, F-value = **26**,  $p < < 0.001$
