# Supplementary material for: The frequency gradient of human resting-state brain oscillations follows cortical hierarchies
Source: eLife journal article supplement (doi:10.7554/elife.53715), 2020-08-21
Supplement: supp [file elife-53715-supp-v1.zip › elife_poa_e53715_Figure_4_figure_supplement_2.pdf]

# Figure 4-figure supplement 2

LMEM: CTres ~ Resting State Networks

|         | SOM       | CON       | DAN       | VAN       | FPN       | AUD       | DMN       |
|---------|-----------|-----------|-----------|-----------|-----------|-----------|-----------|
| t-value | <b>23</b> | <b>60</b> | <b>34</b> | <b>57</b> | <b>10</b> | <b>11</b> | <b>48</b> |

ANOVA, F-value = **949**,  $p < < 0.001$
