# Supplementary figures and images for: The frequency gradient of human resting-state brain oscillations follows cortical hierarchies
Source: eLife journal article supplement (doi:10.7554/elife.53715), 2020-08-21

**Figure 1-figure supplement 1**

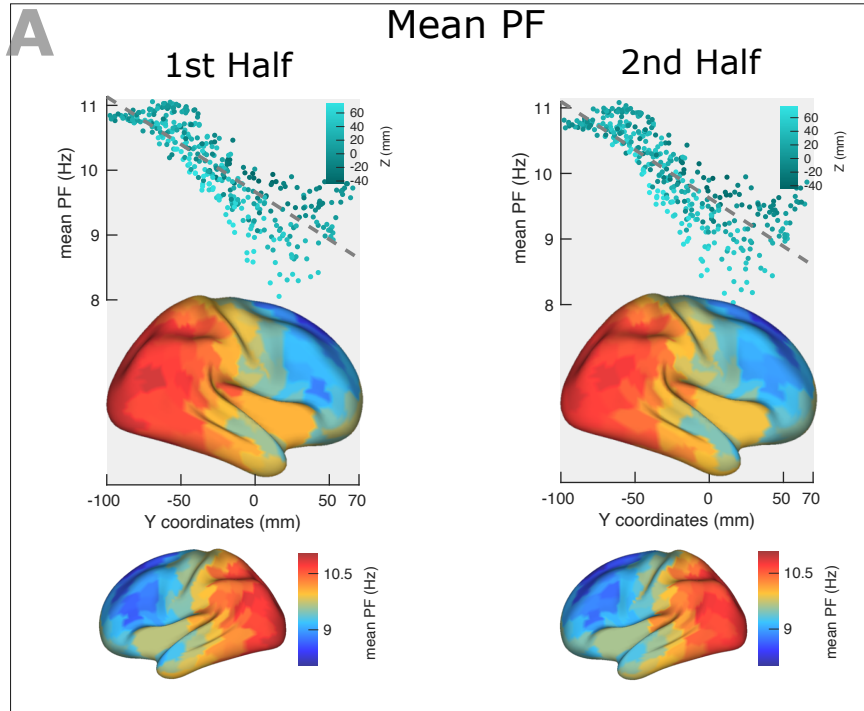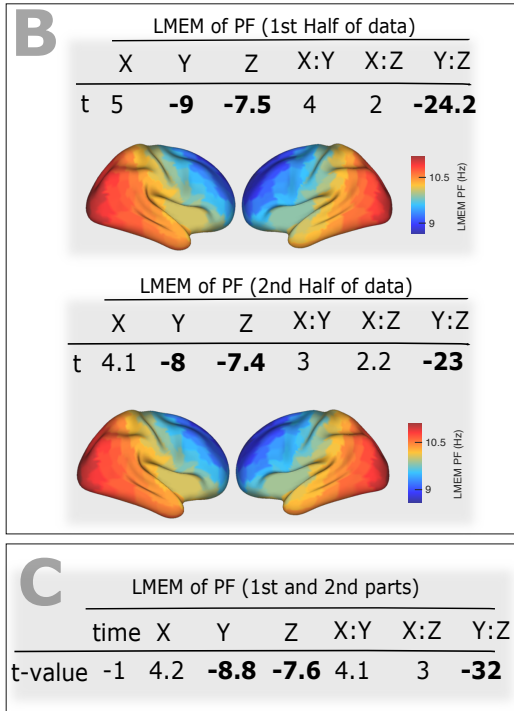

Supplement: supp [file elife-53715-supp-v1.zip › elife_poa_e53715_Figure_1_figure_supplement_1.pdf]

**Figure 3-figure supplement 1**

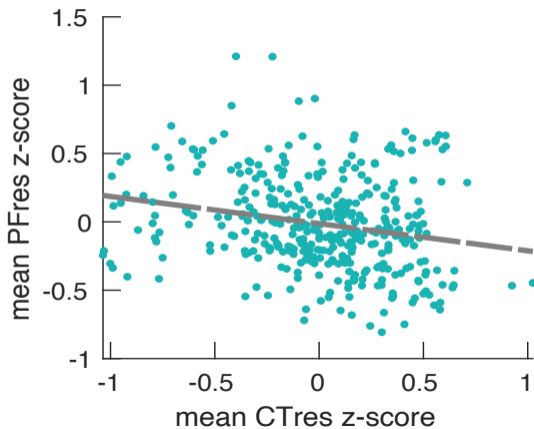

Supplement: supp [file elife-53715-supp-v1.zip › elife_poa_e53715_Figure_3_figure_supplement_1.pdf]

## Figure 3-figure supplement 2

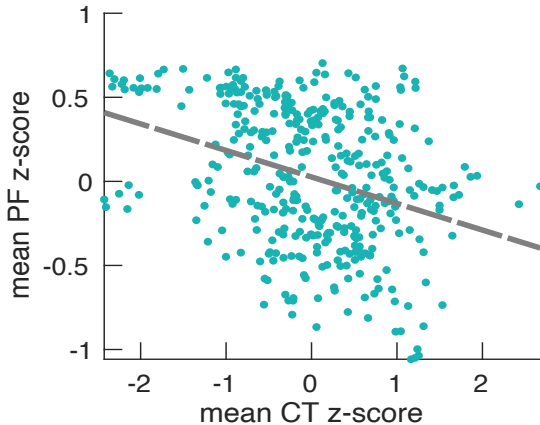

Supplement: supp [file elife-53715-supp-v1.zip › elife_poa_e53715_Figure_3_figure_supplement_2.pdf]

**Figure 6-figure supplement 1**

Theta

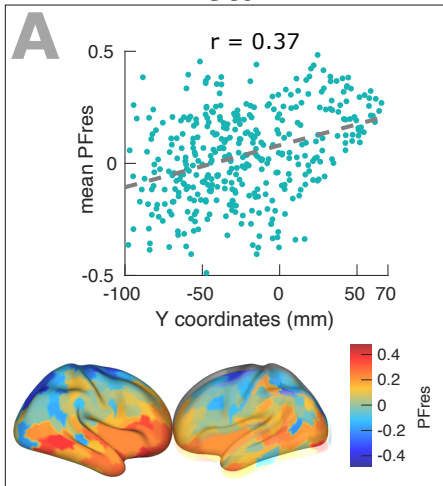

Alpha

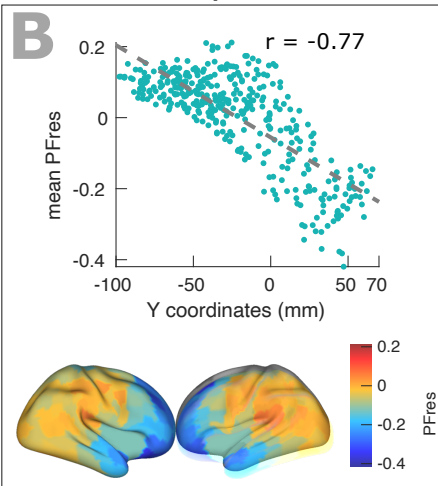

Beta

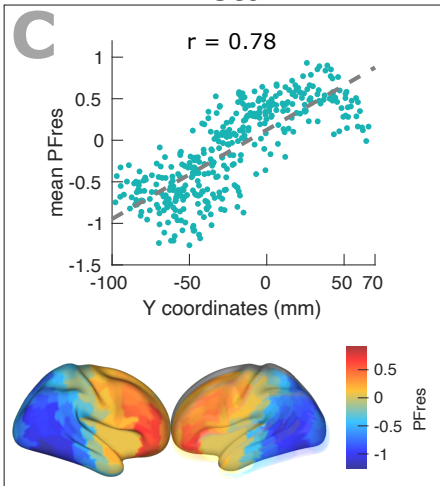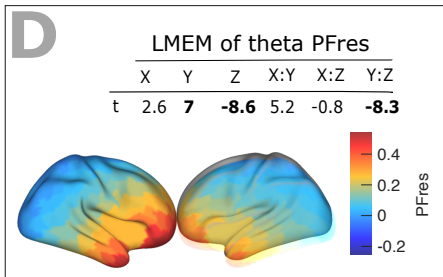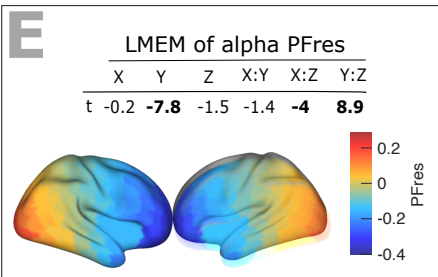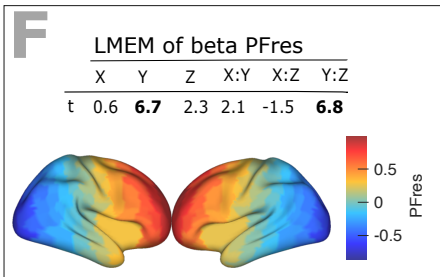

Supplement: supp [file elife-53715-supp-v1.zip › elife_poa_e53715_Figure_6_figure_supplement_1.pdf]

## Figure 6-figure supplement 2

Theta

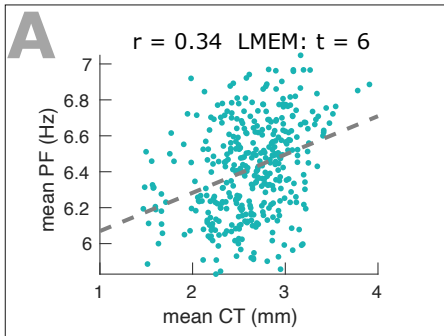

Alpha

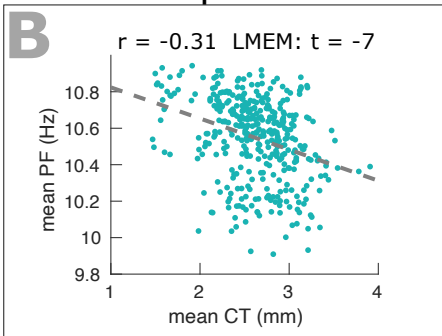

Beta

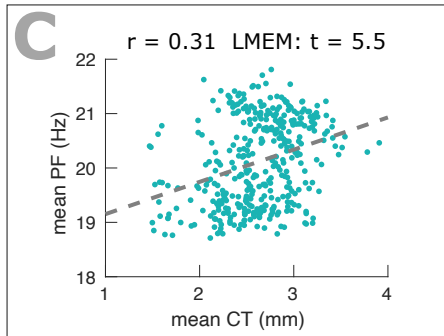

Supplement: supp [file elife-53715-supp-v1.zip › elife_poa_e53715_Figure_6_figure_supplement_2.pdf]
